# Supplementary material
Source: PubMed Central journal article supplement (PMC2492651)
Supplement: pp.108.118604_1.pdf [file pp.108.118604_1.pdf]

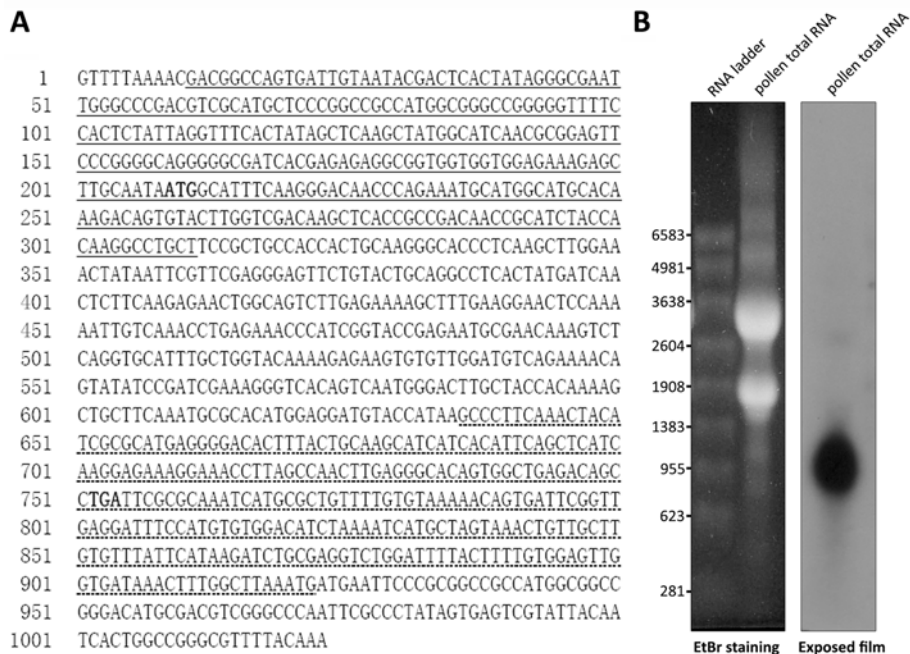

Supplemental Figure 1. The sequence and the estimated length of full-length LILIM1 transcript. (A) Nucleotide sequence of full-length LILIM1 cDNA. Bold fonts, start and stop codons; underline, sequence of the 5' region was used for probing RNA blotting as shown in (B); dashed line, the original sequence obtained from home-made cDNA microarray. (B) Lily pollen tube total RNA blotting was used to estimate the expected length of LILIM1 cDNA clone.
