# Supplementary material
Source: PubMed Central journal article supplement (PMC2492651)
Supplement: pp.108.118604_2.pdf [file pp.108.118604_2.pdf]

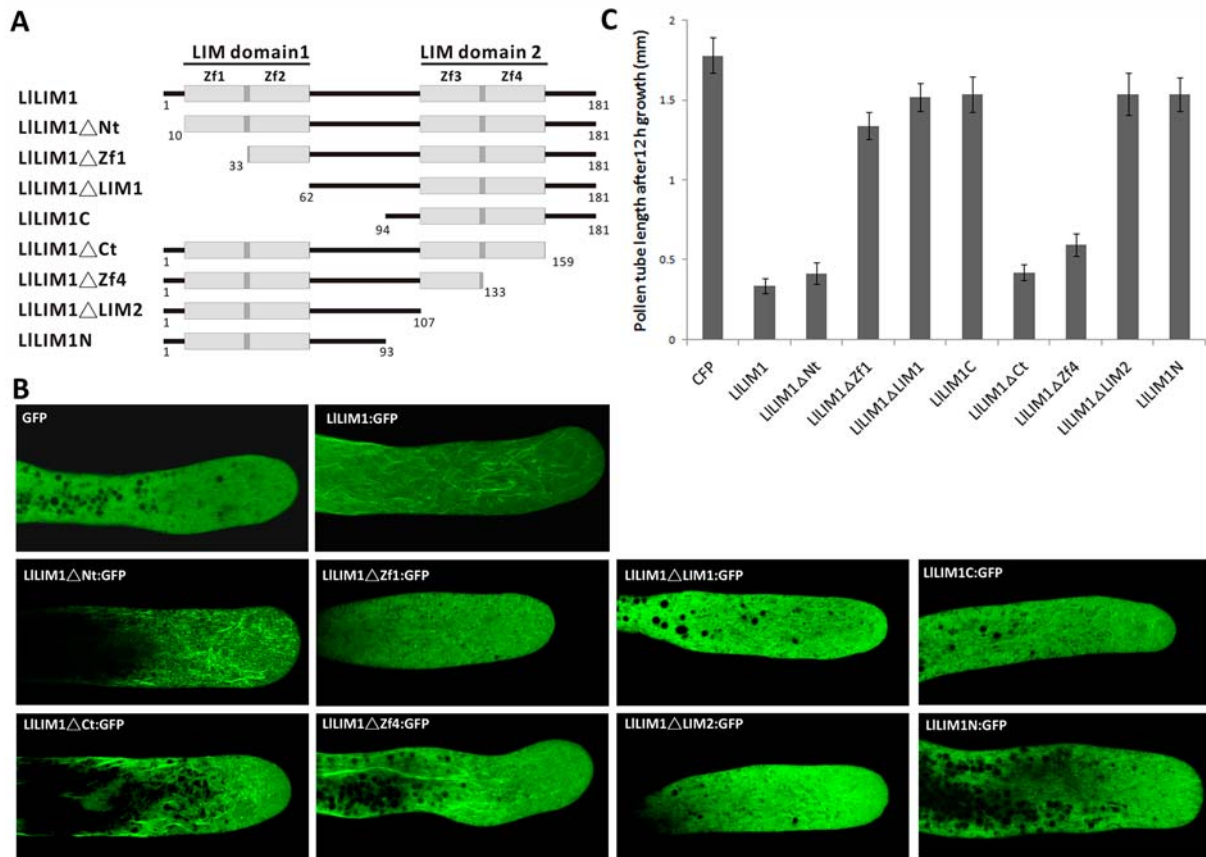

Supplemental Figure 2. Co-sedimentation assays revealed direct binding to promote F-actin bundling by N- (LILIM1N) and C-half (LILIM1C) recombinant LILIM1 proteins.

High-speed co-sedimentation assays were used to examine the binding ability of LILIM1N or LILIM1C recombinant proteins to F-actin. Various amounts (0 to 48  $\mu$ M) of LILIM1N (A) and LILIM1C (B) were incubated with 4  $\mu$ M F-actin for 1 hr, then centrifuged at 100,000xg for 45 min and analyzed by SDS-PAGE. Low-speed co-sedimentation assay was used to examine the capability for F-actin bundle assembly of these recombinant proteins. Various amounts (0 to 64  $\mu$ M) of LILIM1N (C) and LILIM1C (D) recombinant proteins were incubated with 4  $\mu$ M F-actin for 1 hr, then centrifuged at 12,500xg for 45 min. Equal amounts of pellet (P) and supernatants (S) were analyzed by SDS-PAGE and Coomassie Blue staining.
