# Supplementary material
Source: PubMed Central journal article supplement (PMC2492651)
Supplement: pp.108.118604_3.pdf [file pp.108.118604_3.pdf]

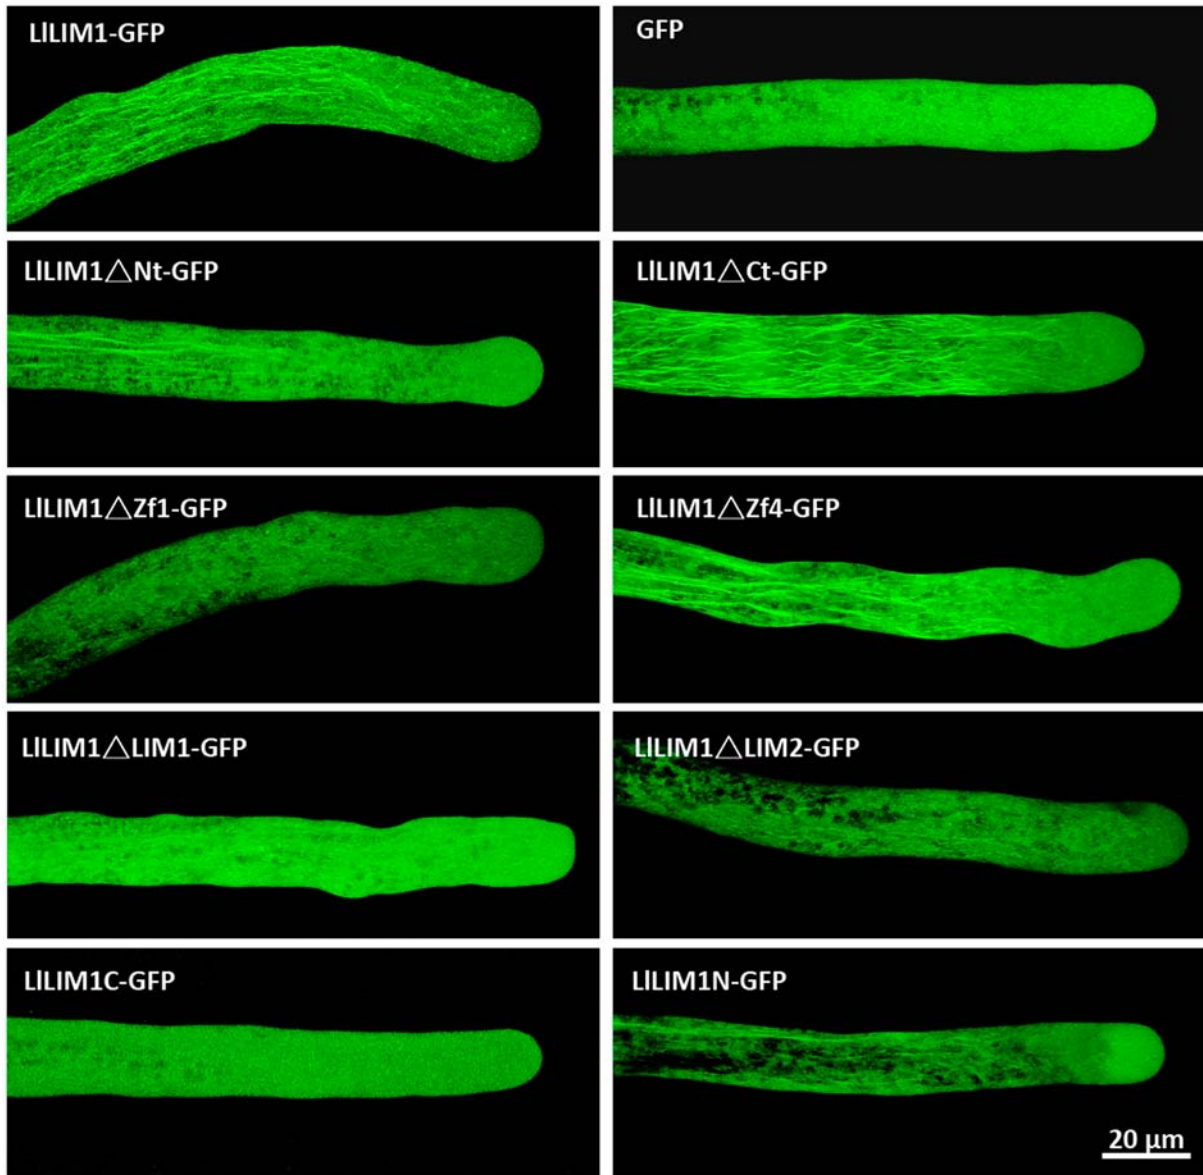

Supplemental Figure 3. Projective images of individual elongating pollen tube containing the variants of deleted LIM counterparts in LILIM1 shown in Figure S3B. Z-serial sections used to assemble the projective images were recorded and edited by fluorescent laser scanning confocal microscopy and application program. Series of optical sections from top to bottom planes through pollen tubes lying flat on the cover-slip surface, representing at least 10 similar images collected in at least three independent experiments.
