# Supplementary material
Source: PubMed Central journal article supplement (PMC2492651)
Supplement: pp.108.118604_4.pdf [file pp.108.118604_4.pdf]

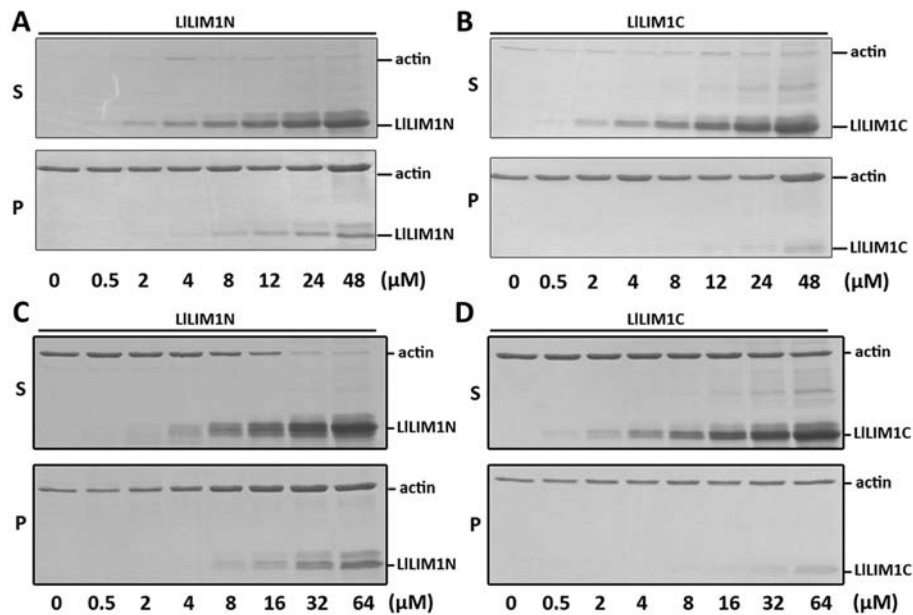

Supplemental Figure 4. Expression of serial deletion of LIM counterparts of LILIM1 in elongating pollen tubes showed various degrees of effects on F-actin decoration and pollen tube growth. (A) The diagram of serial LILIM1 deletion counterparts used in this study. Box, LIM domain; light gray box, zinc-finger motif; dark gray box, the linker between two zinc-finger motifs in each LIM domain; small case number, the position of amino acid present in LILIM1. (B) Typical confocal fluorescent images taken from pollen tubes bombarded with 2.5  $\mu\text{g}$  GFP-tagged individual plasmids followed by culturing in germination medium for 6 hr. Central section through pollen tube lying flat on the cover-slide surface is shown; more than 15 similar images were collected from at least three independent experiments. (C) Analysis of length of pollen tubes measured from 12-hr cultured pollen tubes after being co-bombarded with 5  $\mu\text{g}$  plasmid for LILIM1-deletion counterparts; 2.5  $\mu\text{g}$  plasmids for GFP used as a transformed marker. A representative example of three independent data sets is shown. Error bars indicate 95% confidence intervals ( $n = 60$  to 80).
