# Supplementary material
Source: PubMed Central journal article supplement (PMC2492651)
Supplement: pp.108.118604_5.pdf [file pp.108.118604_5.pdf]

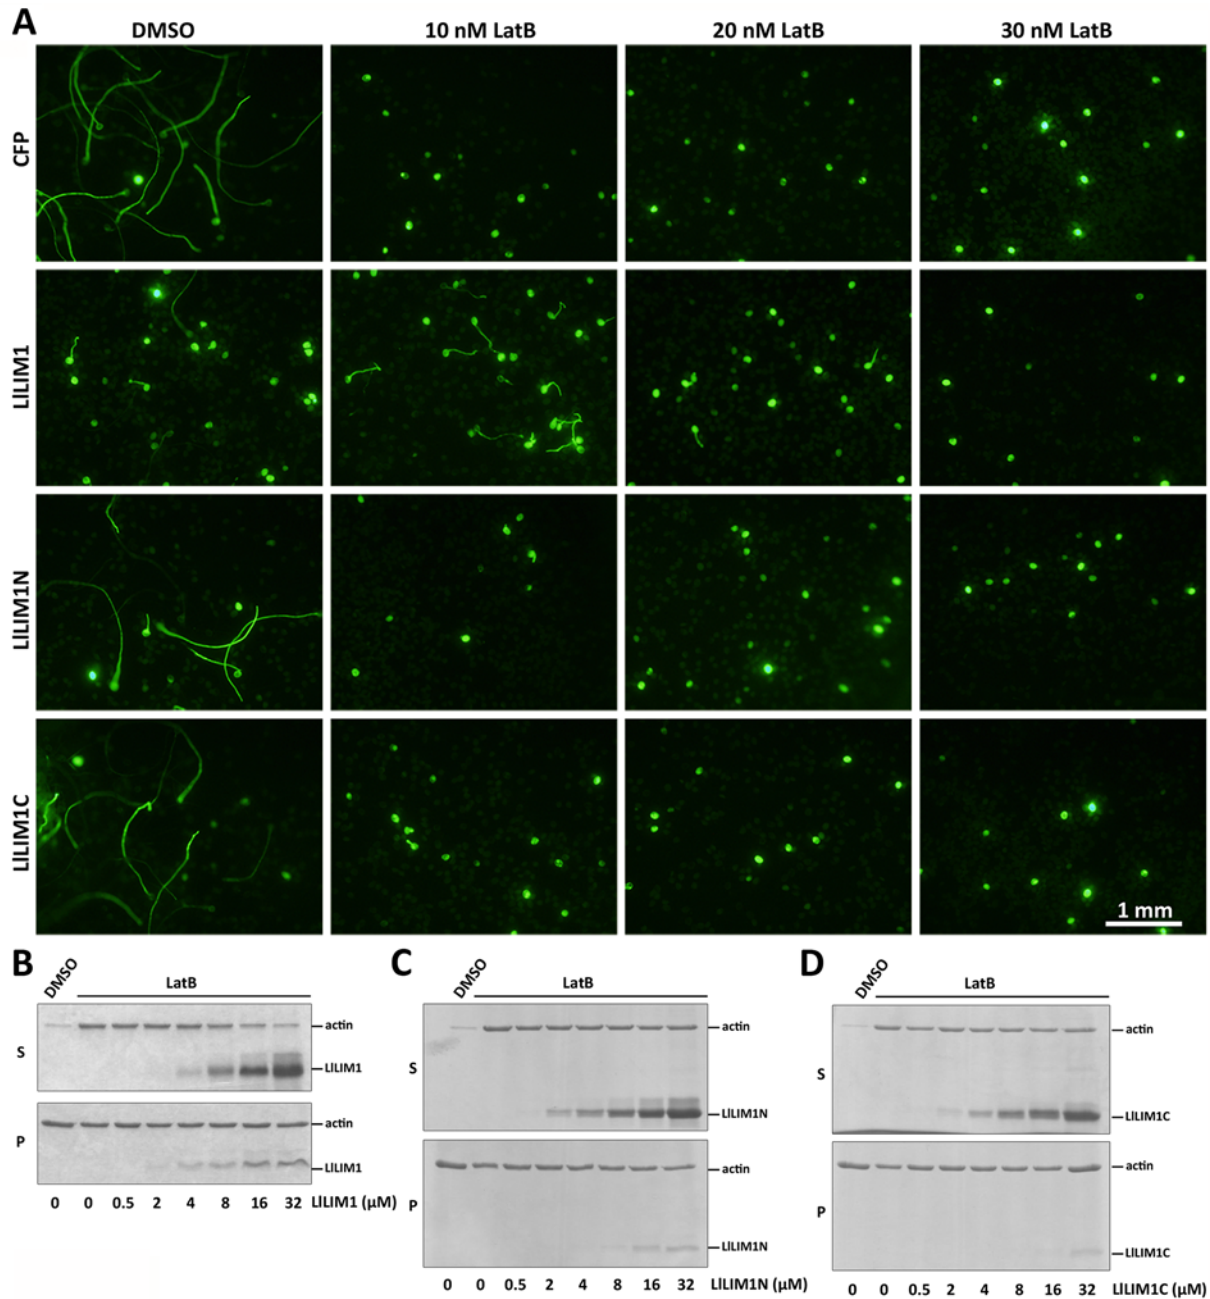

Supplemental Figure 5. Overexpression of LILIM1 in pollen stabilized and protected F-actin from depolymerization by LatB.

(A) Pollen grains co-bombarded with 5 μg plasmids of either CFP (control), LILIM1, LILIM1N, or LILIM1C with 2.5 μg GFP plasmids were cultured in media containing 30 nM DMSO (control) or 10, 20, and 30 nM LatB for 12 hr and observed under epi-fluorescent microscopy with a GFP filter. (B-D) In vitro co-sedimentation assay was used to examine the resistance of 0 to 32 μM of LILIM1 (B), LILIM1N (C), and LILIM1C (D) to LatB-mediated depolymerization of F-actin (4 μM). After incubating with F-actin for 1 hr, the mixtures were incubated with 192 nM DMSO or LatB for another 20 hr. Subsequently, each mixture was centrifuged at 100,000xg for 45 min, and equal amounts of pellet (P) and supernatant (S) were analyzed by SDS-PAGE and Coomassie Blue staining.
