# Supplementary material
Source: PubMed Central journal article supplement (PMC2492651)
Supplement: pp.108.118604_6.pdf [file pp.108.118604_6.pdf]

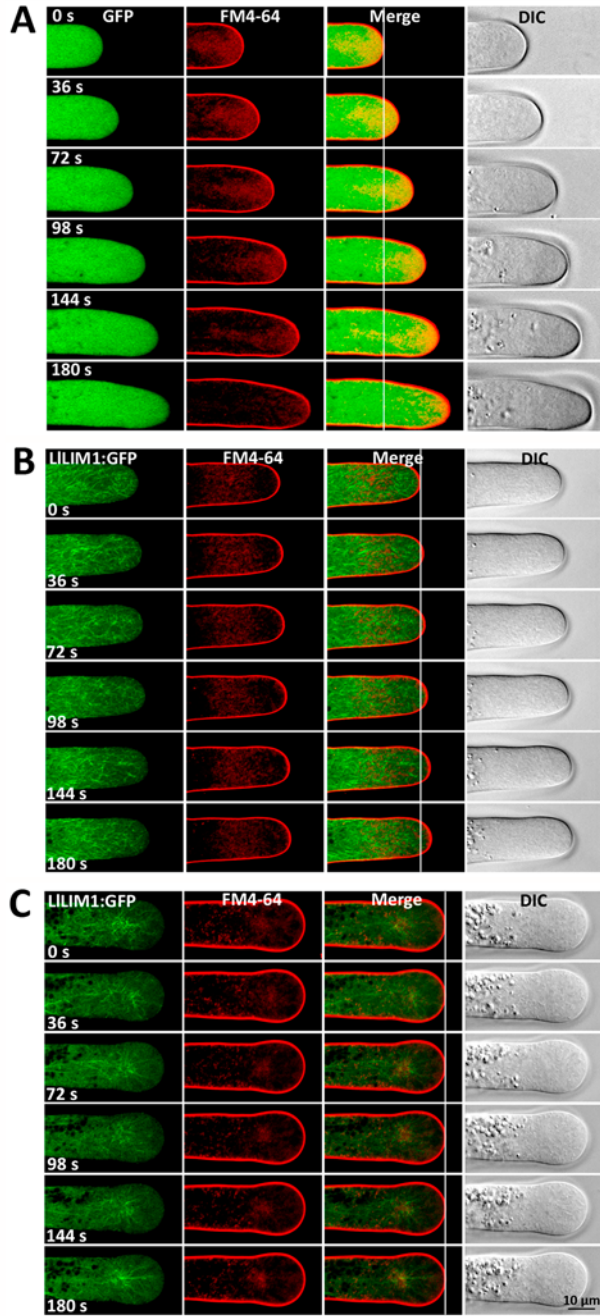

Supplemental Figure 6. LILIM1 overexpression impaired pollen tube growth by disturbing actin dynamics and accumulating abundant FM4-64-labeled vesicles at the subapex of elongating pollen tubes.

Pollen tubes transformed with 5  $\mu$ g expressing plasmids of GFP (A) or LILIM1:GFP (B and C) were stained with FM4-64. Starting from the left panels are the time-lapse confocal images taken at 9-s intervals from GFP, FM4-64, Merge, and DIC channels. White lines in the middle panels represent the initial length of the pollen tube at 0 s. Note the appearance of asterisk-shaped actin aggregates in the subapical zone of pollen tubes overexpressing LILIM1 (B, C). In all cases, the central section through the pollen tubes lying flat on the cover-slide surface is shown, representing at least 3 pollen tubes from similar series-images collected from at least two independent experiments.
