# Supplementary material
Source: PubMed Central journal article supplement (PMC2492651)
Supplement: pp.108.118604_7.pdf [file pp.108.118604_7.pdf]

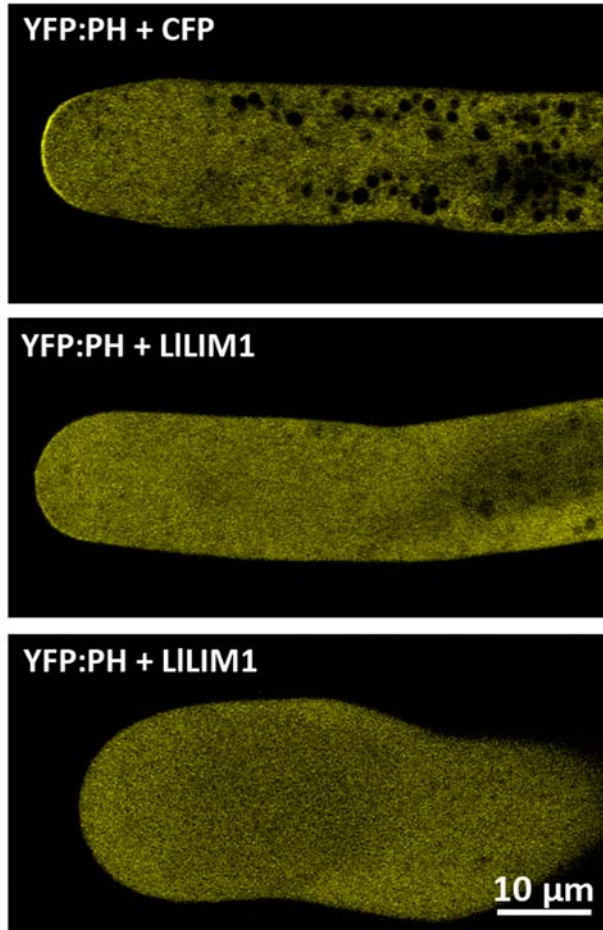

Supplemental Figure 7. LILIM1 overexpression disturbed the apical membrane-localization of signal molecule PIP2 in elongating pollen tube. Images show the typical subcellular localization of YFP-fused PI 4,5-P2 marker, YFP:PH, in CFP- (control, top panel) or LILIM1-co-overexpressed pollen tubes (middle and lower panels represent pollen tubes that were slow growing and that had stopped growing, respectively). In all experiments, pollen grains were co-bombarded with 2.5  $\mu\text{g}$  of expressing plasmid of indicated fluorescent markers and 5  $\mu\text{g}$  of expressing plasmids of CFP and LILIM1, cultured in germination medium for 6 hr, and confocal images were recorded with proper fluorescent channels indicated in the bracket. Images were obtained from the central section of pollen tubes lying flat on the cover-slide surface and represented the typical one of at least 10 similar images collected from at least three independent experiments.
