# Supplementary material
Source: PubMed Central journal article supplement (PMC2492651)
Supplement: pp.108.118604_8.pdf [file pp.108.118604_8.pdf]

Supplemental Table 1. Nucleotide sequences of primer sets used in this study.

| <b>Primer</b>                                                                        | <b>Sequence (5' to 3')<sup>a</sup></b>                       | <b>PCR product</b>                    |
|--------------------------------------------------------------------------------------|--------------------------------------------------------------|---------------------------------------|
| <b>I. Semi-quantitative PCR</b>                                                      |                                                              |                                       |
| <i>Nco</i> ILILIM15'                                                                 | <u>CCCCATGGC</u> ATTTC AAGGGACAACCCAG                        | <i>LILIM1</i> gene                    |
| <i>Nco</i> Bg/IIILILIM13'                                                            | <u>CCCCATGGCAGATCT</u> GGCTGTCTCAGCCACT                      | <i>LILIM1</i> gene                    |
| LlrRNA5'                                                                             | GGACAGTCGGGGGCATTCTGAT                                       | <i>rRNA</i> gene                      |
| LlrRNA3'                                                                             | CCAGACAAATCGCTCCACCAAC                                       | <i>rRNA</i> gene                      |
| <b>II. Expressing fluorescent or non-fluorescent LILIM1 and deletion proteins</b>    |                                                              |                                       |
| <i>Nco</i> ILILIM15'                                                                 | <u>CCCCATGGC</u> ATTTC AAGGGACAACCCAG                        | <i>LILIM1</i> gene and truncated from |
| <i>Bg</i> IIILILIM15'                                                                | AGTCTAGAGGAT <b>AGATCT</b> ATGGCATTTC AAG                    | <i>LILIM1</i> gene                    |
| <i>Nco</i> ILILIM13'                                                                 | <u>CCCCATGGCAGATCT</u> GGCTGTCTCAGCCACT                      | <i>LILIM1</i> gene and truncated from |
| <i>Nco</i> ILILIM1 <sup>Δ</sup> Nt5'                                                 | <u>CCCCATGGGGTGCATGGC</u> ATGCACAAAGACAGTG                   | <i>LILIM1</i> <sup>Δ</sup> Nt gene    |
| <i>Nco</i> ILILIM1 <sup>Δ</sup> Zf15'                                                | <u>CCCCATGGGGCGCTGCC</u> ACCACTGCAAGGGCACCC                  | <i>LILIM1</i> <sup>Δ</sup> Zf1 gene   |
| <i>Nco</i> ILILIM1 <sup>Δ</sup> LIM15'                                               | <u>CCCCATGGGGTATGATCA</u> ACTCTTCAAGAGAACTG                  | <i>LILIM1</i> <sup>Δ</sup> LIM1 gene  |
| <i>Nco</i> ILILIM1C5'                                                                | <u>CCCCATGGGGGCGAACA</u> AAAGTCTCAGGTGCATT                   | <i>LILIM1C</i> gene                   |
| <i>Nco</i> Bg/IIILILIM1 <sup>Δ</sup> Ct3'                                            | <u>CCCCATGGCAGATCT</u> ATGATGCCTTG CAGTAAAGTGTCC             | <i>LILIM1</i> <sup>Δ</sup> Ct gene    |
| <i>Nco</i> Bg/IIILILIM1 <sup>Δ</sup> Zf43'                                           | <u>CCCCATGGCAGATCT</u> TCCATGTGCGCATTGAAGCAGCT               | <i>LILIM1</i> <sup>Δ</sup> Zf4 gene   |
| <i>Nco</i> Bg/IIILILIM1 <sup>Δ</sup> LIM23'                                          | <u>CCCCATGGCAGATCT</u> CTTCTCTTTGTACCAGCAAATGC               | <i>LILIM1</i> <sup>Δ</sup> LIM2 gene  |
| <i>Nco</i> Bg/IIILILIM1N3'                                                           | <u>CCCCATGGCAGATCT</u> ATTCTCGGTACCGATGGGTTTCTC              | <i>LILIM1N</i> gene                   |
| <b>III. Expressing fluorescent protein and expression fluorescent marker protein</b> |                                                              |                                       |
| <i>Xba</i> IRFP5'                                                                    | AAACTCGAGCCATCTAGACCATGGCCTCCTCCGAGGACG                      | <i>RFP</i> gene                       |
| <i>Bg</i> IIIRFP3'                                                                   | CAGCACCTCTAGAA <b>AGATCT</b> GGCGCCGGTGGAGTGGCGGCC           | <i>RFP</i> gene                       |
| <i>Bg</i> IIImTalin5'                                                                | GCCGCCACCACCTGTTCTG <b>AGATCT</b> AACTTTGAGGAACAAAT<br>CCTAG | <i>mTalin</i> gene                    |
| <i>Bg</i> IIImTalin3'                                                                | CCC <b>AGATCT</b> TTAGTGCTCGTCTCGAAGCTCTGAAG                 | <i>mTalin</i> gene                    |
| <i>Bg</i> IIIPH5'                                                                    | GGGATCCTCTAGAG <b>AGATCT</b> GACTCGGGC                       | <i>PH</i> gene                        |
| <i>Bg</i> IIIPH3'                                                                    | CCGCGGTACCGTCTGACT <b>AGATCT</b> CTAGATGTTGAGCTC             | <i>PH</i> gene                        |
| <i>Xba</i> ICYS15'                                                                   | CCCAGCTTGAATTCTCTAGACCATGGGGATGAGGCAG                        | <i>CYS1:GFP</i> gene                  |
| <i>Bg</i> IIIGFP3'                                                                   | CTCAGTTGGAATTCTAGATTA <b>AGATCT</b> GGCGCCGG                 | <i>CYS1:GFP</i> gene                  |
| <i>Nco</i> INAG5'                                                                    | GGGGCCGCCCCCATGGCGAGGATCTCGTGTGAC                            | <i>NAC:CFP</i> gene                   |
| <i>Sac</i> ICFP3'                                                                    | GGCCGCGGCGGAGCTCTATTGTTATAGTTCATCCATGCC                      | <i>NAC:CFP</i> gene                   |

<sup>a</sup>The sequences shown as underlined, bold, gray box, and italicize indicate the *Nco*I, *Bg*III, *Xba*I, and *Sac*I sites, respectively.

**Supplemental Movie Legends**

Time-lapse imaging showing constant intracellular distribution patterns of Nt PLC3, PI 4,5-P<sub>2</sub> and DAG in growing pollen tubes.

Single confocal sections of bombarded lily pollen tubes with 7.5µg plasmid expressing GFP (Movie 1), LILIM1:GFP (Movie 2 and 3) and with 3 µg plasmid expressing LILIM1:GFP (Movie 4). Six hours after gene transfer tubes were imaged at a rate of 1 frames per 9 s (30 images [Movie 1], 60 images [Movie 2 and 3] and 24 images [Movie 4] total), and are replayed at 2 frames (Movie 1, 2 and 3) and 1 frame (Movie 4) per second. All movies show central sections of pollen tubes lying flat on the cover-slip surface and represent at least 3 similar data sets collected in at least two independent experiments.

**Supplemental Movie 1.** Dynamic imaging of GFP and FM4-64 in pollen tubes overexpressing GFP.

**Supplemental Movie 2.** Dynamic imaging of LILIM1:GFP and FM4-64 in pollen tubes overexpressing LILIM1:GFP.

**Supplemental Movie 3.** Dynamic imaging of LILIM1:GFP and FM4-64 in pollen tubes overexpressed LILIM1:GFP.

**Supplemental Movie 4.** Dynamic imaging of LILIM1:GFP in pollen tubes moderately express LILIM1:GFP.
